# Supplementary material for: Projected increases in wildfires may challenge regulatory curtailment of PM 2.5 over the eastern US by 2050
Source: Copernicus journal article supplement (doi:10.5194/acp-23-1769-2023), 2023-02-01
Supplement: Supplementary file [file acp-23-1769-2023-supplement.pdf]

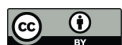

*Supplement of*

## **Projected increases in wildfires may challenge regulatory curtailment of PM<sub>2.5</sub> over the eastern US by 2050**

**Chandan Sarangi et al.**

*Correspondence to:* Chandan Sarangi (chandansarangi@iitm.ac.in) and Yun Qian (yun.qian@pnnl.gov)

The copyright of individual parts of the supplement might differ from the article licence.

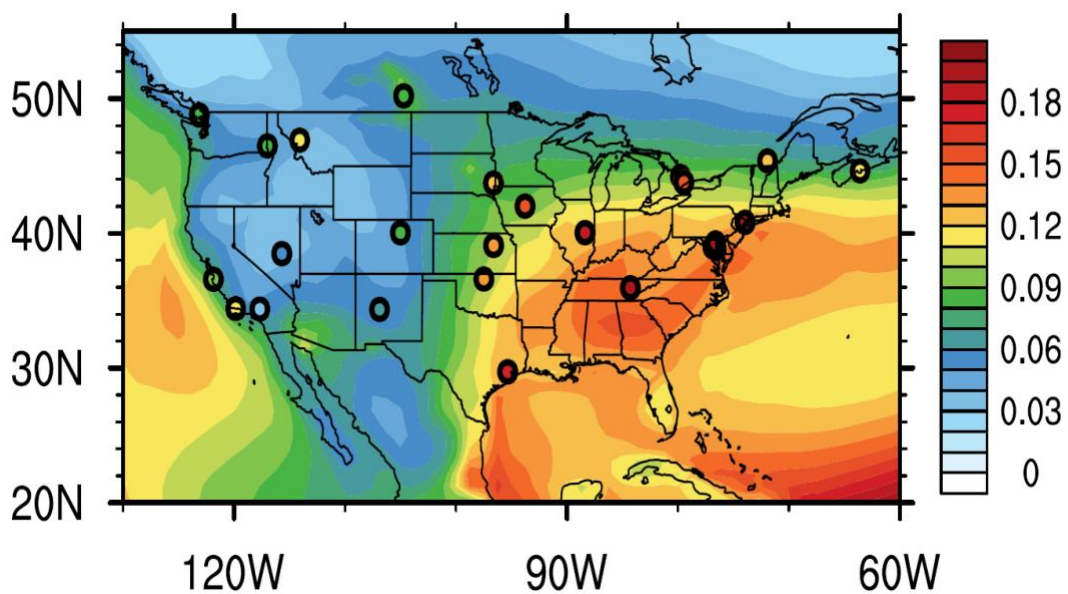

Supplementary Figure 1: Evaluation of the simulated AOD at 550 nm (unitless) against observations at the AERONET sites in North America. Comparison of decadal-averaged (2001-2010) annual mean AOD between the simulation (shading) and AERONET in-situ observations (colored circles) in the 2000s.

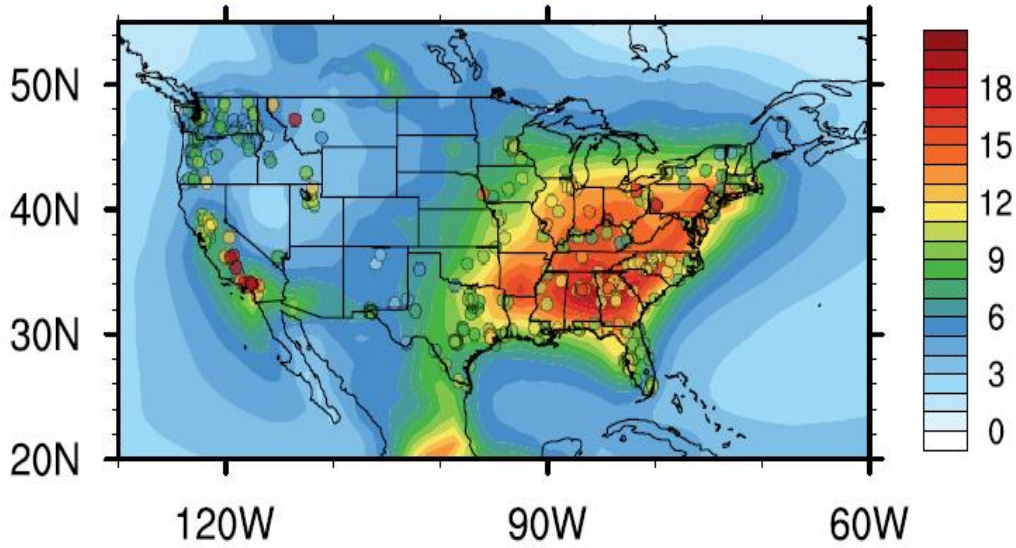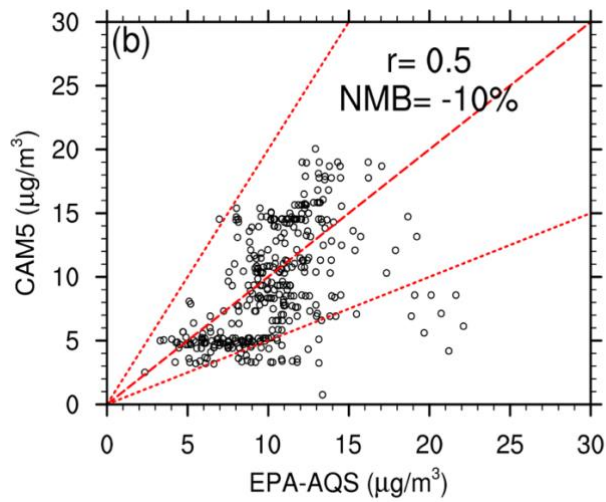

Supplementary Figure 2: Evaluation of the CAM5 simulated surface  $PM_{2.5}$  ( $\mu\text{g m}^{-3}$ ) with fire emissions from RESFire. Comparison of decadal-averaged (2001-2010) annual surface  $PM_{2.5}$  between the simulation (shading) and the Interagency Monitoring of Protected Visual Environments (IMPROVE) data from US EPA Air Quality System (AQS) in situ observations (colored circles) in the 2000s; (b) Comparison of simulated and in-situ measured annual mean surface  $PM_{2.5}$ .

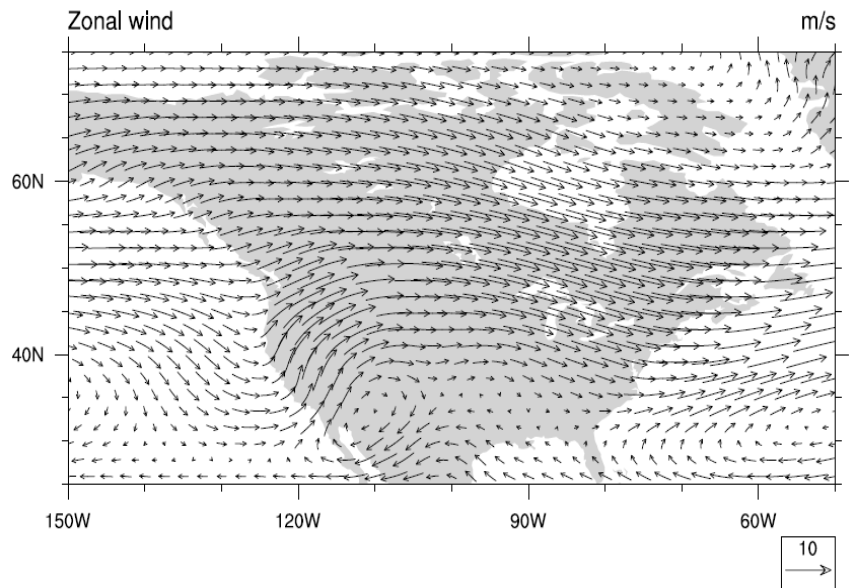

Supplementary Figure 3A: Spatial distribution of mean summertime wind vector over North America at 800 hPa from the 2000<sub>ALL</sub> simulation. Differences in the mean wind vector among the 4 simulations are negligible (not shown).

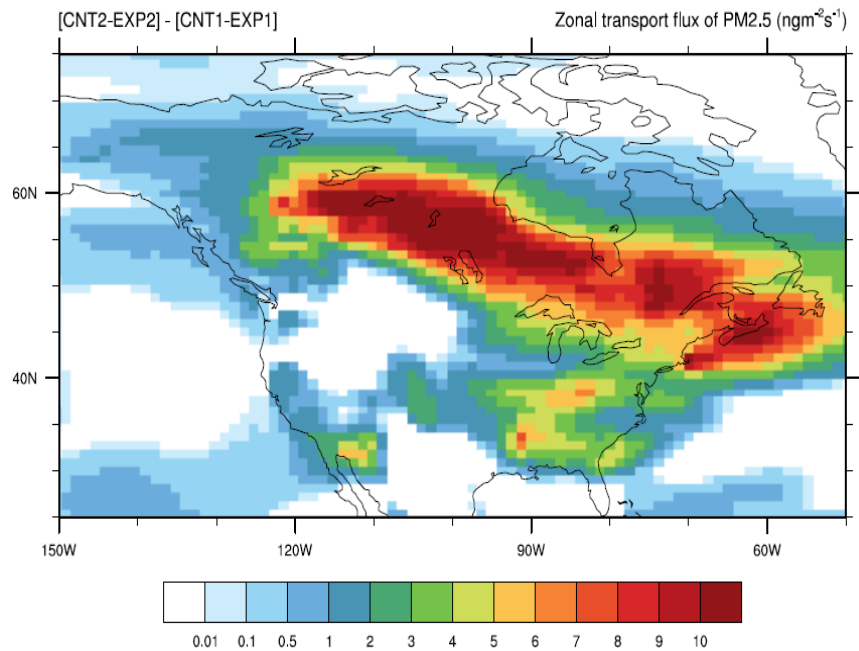

Supplementary Figure 3B: Spatial distribution of the decadal mean difference in summer mean zonal flux ( $U \cdot PM_{2.5}$  values) of wildfire-induced  $PM_{2.5}$  between the 2000s and the 2050s ( $[2050_{ALL} - 2050_{WEF}] - [2000_{ALL} - 2000_{WEF}]$ ) within the planetary boundary layer (from the surface to 800 hPa).

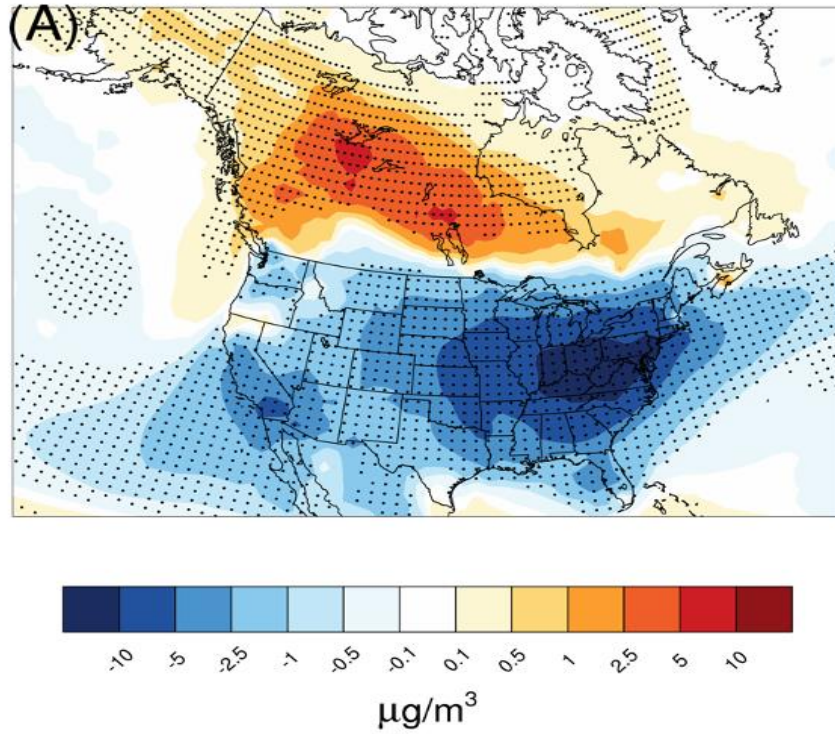

Supplementary Figure 4: Spatial distribution of surface PM<sub>2.5</sub> in 10-year averaged summer mean quantities over North America from the present day to the mid-21<sup>st</sup> century (2050<sub>ALL</sub>-2000<sub>ALL</sub>). Areas marked with black dots indicate grids where changes are significant at the 95% confidence level.
